# Supplementary material for: Patient Personality and Therapist Response: An Empirical Investigation
Source: Atypon-hosted journal article supplement (doi:10.1176/appi.ajp.2013.13020224), 2013-09-30
Supplement: 102_ds001.pdf [file 102_ds001.pdf]

**Main Items Making up the Therapist Response Questionnaire Factors (reference 19)**

---

| Countertransference Factor  | Items                                                                                                                                                                                                                                                                                                                                                                                                                                                               |
|-----------------------------|---------------------------------------------------------------------------------------------------------------------------------------------------------------------------------------------------------------------------------------------------------------------------------------------------------------------------------------------------------------------------------------------------------------------------------------------------------------------|
| 1) Criticized/mistreated    | I feel unappreciated by him/her<br>I feel criticized by him/her<br>I feel dismissed or devalued<br>I feel I am “walking on eggshells” when with him/her and afraid that if I say the wrong thing s/he will explode, fall apart or walk out<br>I have to stop myself from saying or doing something aggressive or critical                                                                                                                                           |
| 2) Helpless/inadequate      | I feel I am failing to help him/her or I worry that I won’t be able to help him/her<br>I feel incompetent or inadequate working with him/her<br>I think s/he might do better with another therapist or in a different kind of therapy<br>I feel overwhelmed by his/her needs<br>I feel less successful helping him/her than other patients<br>I feel anxious working with him/her<br>I feel confused in sessions with him/her                                       |
| 3) Positive                 | S/he is one of my favorite patients<br>I like him/her very much<br>I find it exciting working with him/her<br>I am very hopeful about the gains s/he is making or is likely to make in treatment<br>I have trouble relating to the feelings s/he expresses [Reversed]<br>I feel like I understand him/her                                                                                                                                                           |
| 4) Parental/protective      | I feel like I want to protect him/her<br>I feel nurturant toward him/her<br>I have warm, almost parental feelings toward him/her<br>I wish I could give him/her what others never could<br>I feel angry at people in his/her life                                                                                                                                                                                                                                   |
| 5) Overwhelmed/disorganized | I feel resentful working with him/her<br>I wish I had never taken him/her on as a patient<br>When checking my phone messages, I feel anxiety or dread that there will be one from him/her<br>S/he frightens me<br>I feel used or manipulated by him/her<br>I think or fantasize about ending the treatment<br>I feel mistreated or abused by him/her<br>I feel pushed to set very firm limits with him/her<br>I feel angry at him/her<br>I feel repulsed by him/her |
| 6) Special/overinvolved     | I disclose my feelings with him/her more than with other patients<br>I self-disclose more about my personal life with him/her than with my other patients<br>I do things for him/her, or go the extra mile for him/her, in a way that I don’t do for other patients<br>I feel guilty when s/he is distressed or deteriorates, as if I must be somehow responsible<br>I end sessions late with him/her more than with my other patients                              |

---

7) Sexualized

I find myself being flirtatious with him/her  
I feel sexually attracted to him/her  
I feel sexual tension in the room  
I tell him/her I love him/her

---

8) Disengaged

I feel bored in sessions with him/her  
My mind often wanders to things other than what s/he is talking about  
I don't feel fully engaged in sessions with him/her  
I lose my temper with him/her  
I watch the clock with him/her more than with my other patients  
I feel annoyed in sessions with him/her

---
